# Supplementary material
Source: PubMed Central journal article supplement (PMC8150566)
Supplement: sj-pdf-2-jrs-10.1177_01410768211001583.pdf [file sj-pdf-2-jrs-10.1177_01410768211001583.pdf]

**Supplementary table 1: transport assumptions**

| <b>Country of origin</b> | <b>Airport</b>             | <b>Assumed distance for air freight to London Gatwick Airport (km)</b> | <b>Port</b>     | <b>Assumed distance for shipping to London Gateway Port (km)</b> |
|--------------------------|----------------------------|------------------------------------------------------------------------|-----------------|------------------------------------------------------------------|
| China                    | Beijing International      | 7903                                                                   | Shanghai        | 19303                                                            |
| Egypt                    | Cairo International        | 3503                                                                   | Damietta        | 5952                                                             |
| France                   | Charles de Gaulle          | 310                                                                    | Le Harve        | 347                                                              |
| Germany                  | Frankfurt                  | 630                                                                    | Hamburg         | 739                                                              |
| Malaysia                 | Kuala Lumpur International | 10603                                                                  | Port Klang      | 15026                                                            |
| Mexico                   | Mexico City International  | 8944                                                                   | Lázaro Cárdenas | 11868                                                            |
| Thailand                 | Suvarnabhumi International | 9579                                                                   | Bangkok         | 16950                                                            |

Assumed airports, ports, and distances to the UK. We included 160km of travel by road via heavy goods vehicles both within the country of origin and in the UK, with an additional 8km either end of each journey via courier.

**Supplementary table 2: Life cycle inventory processes chosen for PPE**

| <b>Material</b>                                                     | <b>Process Name</b>                                                                                                                                |
|---------------------------------------------------------------------|----------------------------------------------------------------------------------------------------------------------------------------------------|
| Aluminium                                                           | Sheet rolling, aluminium {GLO}  market for   Cut-off, U                                                                                            |
| Anionic surfactant                                                  | Anionic resin {RoW}  market for anionic resin   Cut-off, U                                                                                         |
| Box board                                                           | Folding boxboard/chipboard {GLO}  market for   Cut-off, U                                                                                          |
| Corrugated cardboard                                                | Corrugated board box {RoW}  market for corrugated board box   Cut-off, U                                                                           |
| LDPE film                                                           | Packaging film, low density polyethylene {GLO}  market for   Cut-off, U                                                                            |
| Melt-blown polypropylene                                            | Textile, non-woven polypropylene {GLO}  market for textile, non woven polypropylene   Cut-off, U                                                   |
| Non-woven polypropylene                                             |                                                                                                                                                    |
| Nonionic surfactant                                                 | Non-ionic surfactant {GLO}  market for non-ionic surfactant   Cut-off, U                                                                           |
| Paper                                                               | Kraft paper, bleached {GLO}  market for   Cut-off, U                                                                                               |
| Polyester microfibre                                                | Textile, non-woven polyester {GLO}  market for textile, non woven polyester   Cut-off, U                                                           |
| Polypropylene, injection moulded                                    | Polypropylene, granulate {GLO}  market for   Cut-off, U                                                                                            |
| Polypropylene, oriented film                                        |                                                                                                                                                    |
| Polyurethane foam                                                   | Polyurethane, flexible foam {RoW}  market for polyurethane, flexible foam   Cut-off, U                                                             |
| Quaternary ammonium compounds and polymeric biguanide hydrochloride | Ammonia, liquid {RoW}  market for   Cut-off, U                                                                                                     |
| Sodium hydroxide                                                    | Sodium hydroxide, without water, in 50% solution state {GLO}  market for   Cut-off, U                                                              |
| Sodium hypochlorite                                                 | Sodium hypochlorite, without water, in 15% solution state {RoW}  market for sodium hypochlorite, without water, in 15% solution state   Cut-off, U |
| Steel                                                               | Wire drawing, steel {GLO}  market for   Cut-off, U                                                                                                 |
| Synthetic rubber                                                    | Synthetic rubber {GLO}  market for   Cut-off, U                                                                                                    |
| Tissue paper                                                        | Tissue paper {GLO}  market for   Cut-off, U                                                                                                        |
| <b>Electricity</b>                                                  | <b>Process Name</b>                                                                                                                                |
| Electricity (China)                                                 | Electricity, medium voltage {CN} market group for   Cut-off, U                                                                                     |
| Electricity (France)                                                | Electricity, medium voltage {FR}  market for   Cut-off, U                                                                                          |
| Electricity (UK)                                                    | Electricity, medium voltage {GB}  market for   Cut-off, U                                                                                          |
| Electricity (Malaysian)                                             | Electricity, medium voltage {MY}  market for   Cut-off, U                                                                                          |

| <b>Transportation</b>  | <b>Process Name</b>                                                                                                                     |
|------------------------|-----------------------------------------------------------------------------------------------------------------------------------------|
| Air freight            | Transport, freight, aircraft, long haul {GLO}  market for transport, freight, aircraft, long haul   Cut-off, U                          |
| Courier                | Transport, freight, light commercial vehicle {GLO}  market group for transport, freight, light commercial vehicle   Cut-off, U          |
| Heavy goods vehicle    | Transport, freight, lorry, unspecified {GLO}  market group for transport, freight, lorry, unspecified   Cut-off, U                      |
| Shipping container     | Transport, freight, sea, container ship {GLO}  market for transport, freight, sea, container ship   Cut-off, U                          |
| <b>Waste</b>           | <b>Process Name</b>                                                                                                                     |
| Hazardous incineration | Hazardous waste, for incineration {Europe without Switzerland}  treatment of hazardous waste, hazardous waste incineration   Cut-off, U |

Processes selected for PPE LCA. Ecoinvent (version 3.6)- allocation, cut-off by classification- unit library was selected for all processes.

**Supplementary table 3: linen laundering assumptions**

| Input                             |                     | Source                      | Quantity used per kg of dry linen |
|-----------------------------------|---------------------|-----------------------------|-----------------------------------|
| Detergent                         | Anionic surfactant  | Carre <sup>1</sup>          | 0.54 g                            |
|                                   | Nonionic surfactant |                             | 1.8 g                             |
|                                   | Sodium hydroxide    |                             | 1.92 g                            |
|                                   | Sodium hypochlorite |                             | 1.1 g                             |
| Electricity                       |                     | Vozzola et al. <sup>2</sup> | 0.28 kWh                          |
| Natural gas                       |                     |                             | 1.59 kWh                          |
| Transport via heavy goods vehicle |                     | Assumed                     | 160 kg.km                         |
| Water                             | Supply              | Vozzola et al. <sup>2</sup> | 0.01100 m <sup>3</sup>            |
|                                   | Treatment           |                             | 0.01097 m <sup>3</sup>            |

kWh= kilowatt hours, m<sup>3</sup>= meters cubed, kg.km= kilogram kilometres.

1. Carre A. Life cycle assessment comparing laundered surgical gowns with polypropylene based disposable gowns. Melbourne, Australia: RMIT University; 2008.

2. Vozzola E, Overcash M, Griffing E. Environmental considerations in the selection of isolation gowns: A life cycle assessment of reusable and disposable alternatives. Am J Infect Control. 2018;46(8):881-6.

**Supplementary table 4: Environmental impact of one apron**

| Impact category                                | Unit                     | Total       | Packaging film, low density polyethylene {GLO}   market for   Cut-off, U | Corrugated board box {RoW}   market for corrugated board box   Cut-off, U | Packaging film, low density polyethylene {GLO}   market for   Cut-off, U | Transport, freight, sea, container ship {GLO}   market for transport, freight, sea, container ship   Cut-off, U | Transport, freight, light commercial vehicle {GLO}   market group for transport, freight, light commercial vehicle   Cut-off, U | Transport, freight, lorry, unspecified {GLO}   market group for transport, freight, lorry, unspecified   Cut-off, U | Electricity, medium voltage {CN}   market group for   Cut-off, U | Electricity, medium voltage {TH}   market for   Cut-off, U | PPE clinical waste |
|------------------------------------------------|--------------------------|-------------|--------------------------------------------------------------------------|---------------------------------------------------------------------------|--------------------------------------------------------------------------|-----------------------------------------------------------------------------------------------------------------|---------------------------------------------------------------------------------------------------------------------------------|---------------------------------------------------------------------------------------------------------------------|------------------------------------------------------------------|------------------------------------------------------------|--------------------|
| <b>Global warming</b>                          | kg CO <sub>2</sub> e     | 0.065280133 | 0.031777301                                                              | 0.000245003                                                               | 0.000102487                                                              | 0.0018351                                                                                                       | 0.000608815                                                                                                                     | 0.000441633                                                                                                         | 0.004535052                                                      | 0.000390236                                                | 0.02534449         |
| <b>Stratospheric ozone depletion</b>           | kg CFC11 eq              | 2.03E-08    | 8.06196E-09                                                              | 2.44109E-10                                                               | 2.60011E-11                                                              | 1.29E-09                                                                                                        | 3.67556E-10                                                                                                                     | 2.06736E-10                                                                                                         | 9.66461E-10                                                      | 1.15915E-10                                                | 9.01E-09           |
| <b>Ionizing radiation</b>                      | kBq Co-60 eq             | 0.00251773  | 0.002001859                                                              | 7.30242E-06                                                               | 6.4563E-06                                                               | 1.91E-05                                                                                                        | 1.88829E-05                                                                                                                     | 8.62711E-06                                                                                                         | 6.95485E-05                                                      | 8.5941E-07                                                 | 0.000385128        |
| <b>Ozone formation, Human health</b>           | kg NO <sub>x</sub> eq    | 0.000156504 | 7.67665E-05                                                              | 7.65766E-07                                                               | 2.47584E-07                                                              | 3.82E-05                                                                                                        | 2.7308E-06                                                                                                                      | 2.39737E-06                                                                                                         | 1.25632E-05                                                      | 5.3224E-07                                                 | 2.23E-05           |
| <b>Fine particulate matter formation</b>       | kg PM2.5 eq              | 8.14E-05    | 4.2836E-05                                                               | 4.02437E-07                                                               | 1.38153E-07                                                              | 1.22E-05                                                                                                        | 9.71347E-07                                                                                                                     | 6.43614E-07                                                                                                         | 6.92792E-06                                                      | 3.16651E-07                                                | 1.70E-05           |
| <b>Ozone formation, Terrestrial ecosystems</b> | kg NO <sub>x</sub> eq    | 0.000163703 | 8.30787E-05                                                              | 7.81684E-07                                                               | 2.67941E-07                                                              | 3.84E-05                                                                                                        | 2.81687E-06                                                                                                                     | 2.44532E-06                                                                                                         | 1.25898E-05                                                      | 5.42528E-07                                                | 2.27E-05           |
| <b>Terrestrial acidification</b>               | kg SO <sub>2</sub> eq    | 0.000196905 | 9.40803E-05                                                              | 8.65169E-07                                                               | 3.03423E-07                                                              | 3.79E-05                                                                                                        | 2.11228E-06                                                                                                                     | 1.48405E-06                                                                                                         | 1.54635E-05                                                      | 8.33185E-07                                                | 4.39E-05           |
| <b>Freshwater eutrophication</b>               | kg P eq                  | 1.91E-05    | 8.88645E-06                                                              | 9.74318E-08                                                               | 2.86602E-08                                                              | 7.22E-08                                                                                                        | 1.12707E-07                                                                                                                     | 4.05883E-08                                                                                                         | 8.27533E-07                                                      | 2.40319E-07                                                | 8.84E-06           |
| <b>Marine eutrophication</b>                   | kg N eq                  | 1.75E-06    | 1.08866E-06                                                              | 5.53837E-08                                                               | 3.5111E-09                                                               | 6.93E-09                                                                                                        | 6.79274E-09                                                                                                                     | 3.2385E-09                                                                                                          | 5.35525E-08                                                      | 1.57581E-08                                                | 5.12E-07           |
| <b>Terrestrial ecotoxicity</b>                 | kg 1,4-DCB               | 0.1159339   | 0.065167219                                                              | 0.001024047                                                               | 0.000210174                                                              | 0.004892366                                                                                                     | 0.00400804                                                                                                                      | 0.008440728                                                                                                         | 0.002995972                                                      | 0.000201959                                                | 0.028993398        |
| <b>Freshwater ecotoxicity</b>                  | kg 1,4-DCB               | 0.001721327 | 0.001011849                                                              | 1.08516E-05                                                               | 3.26337E-06                                                              | 1.97E-05                                                                                                        | 5.91267E-05                                                                                                                     | 1.03475E-05                                                                                                         | 6.96628E-05                                                      | 1.01443E-05                                                | 0.000526426        |
| <b>Marine ecotoxicity</b>                      | kg 1,4-DCB               | 0.002293897 | 0.001332203                                                              | 1.42195E-05                                                               | 4.29656E-06                                                              | 2.81E-05                                                                                                        | 7.82752E-05                                                                                                                     | 1.80408E-05                                                                                                         | 9.21552E-05                                                      | 1.35003E-05                                                | 0.000713144        |
| <b>Human carcinogenic toxicity</b>             | kg 1,4-DCB               | 0.003935434 | 0.000986104                                                              | 7.26716E-06                                                               | 3.18034E-06                                                              | 4.14E-05                                                                                                        | 2.72105E-05                                                                                                                     | 1.01608E-05                                                                                                         | 0.000127373                                                      | 1.41123E-05                                                | 0.002718647        |
| <b>Human non-carcinogenic toxicity</b>         | kg 1,4-DCB               | 0.039912556 | 0.021923231                                                              | 0.000264608                                                               | 7.07058E-05                                                              | 0.000327085                                                                                                     | 0.00119536                                                                                                                      | 0.000340164                                                                                                         | 0.002145158                                                      | 0.000295157                                                | 0.013351086        |
| <b>Land use</b>                                | m <sup>2</sup> a crop eq | 0.001441517 | 0.001038614                                                              | 0.000109955                                                               | 3.34969E-06                                                              | 6.52E-06                                                                                                        | 1.64576E-05                                                                                                                     | 2.41682E-05                                                                                                         | 5.43358E-05                                                      | 1.37524E-06                                                | 1.87E-04           |

|                                  |                |             |             |             |             |            |             |             |             |             |             |
|----------------------------------|----------------|-------------|-------------|-------------|-------------|------------|-------------|-------------|-------------|-------------|-------------|
| <b>Mineral resource scarcity</b> | kg Cu eq       | 0.000100139 | 6.58362E-05 | 7.16812E-07 | 2.12332E-07 | 4.63E-06   | 2.90321E-06 | 1.65254E-06 | 1.88885E-06 | 2.70822E-07 | 2.20E-05    |
| <b>Fossil resource scarcity</b>  | kg oil eq      | 0.022970775 | 0.018777169 | 6.9035E-05  | 6.05592E-05 | 0.00054157 | 0.000198108 | 0.000152517 | 0.000880587 | 0.000114521 | 0.002176709 |
| <b>Water consumption</b>         | m <sup>3</sup> | 0.000648351 | 0.000541592 | 2.92374E-06 | 1.74672E-06 | 1.22E-06   | 1.49607E-06 | 8.13631E-07 | 1.11521E-05 | 1.57455E-06 | 8.58E-05    |

Environmental impacts (midpoint categories) measured using life cycle assessment modelled on one apron (with shipping, and waste via hazardous incineration). 1,4-DCB =dichlorobenzene, CFC11= Trichlorofluoromethane, CO<sub>2</sub>e= carbon dioxide equivalents, Cu= copper, eq= equivalents, kBq Co-60 eq = kilobecquerel Cobalt-60, m<sup>2</sup>a = square meter years, N= nitrogen, NO<sub>x</sub>= nitrous oxides, P=phosphate, PM2.5 = particulate matter <2.5 micrometers, SO<sub>2</sub>= sulphur dioxide

**Supplementary Table 5: Environmental impact of one face shield**

| <b>Impact category</b>                         | <b>Unit</b>           | <b>Total</b> | Packaging film, low density polyethylene {GLO}  market for   Cut-off, U | Polyurethane, flexible foam {RoW}  market for polyurethane, flexible foam   Cut-off, U | Synthetic rubber {GLO}  market for   Cut-off, U | Packaging film, low density polyethylene {GLO}  market for   Cut-off, U | Corrugated board box {RoW}  market for corrugated board box   Cut-off, U | Transport, freight, lorry, unspecified {GLO}  market group for transport, freight, lorry, unspecified   Cut-off, U | Transport, freight, light commercial vehicle {GLO}  market group for transport, freight, light commercial vehicle   Cut-off, U | Transport, freight, sea, container ship {GLO}  market for transport, freight, sea, container ship   Cut-off, U | Electricity, medium voltage {CN}  market group for   Cut-off, U | PPE clinical waste |
|------------------------------------------------|-----------------------|--------------|-------------------------------------------------------------------------|----------------------------------------------------------------------------------------|-------------------------------------------------|-------------------------------------------------------------------------|--------------------------------------------------------------------------|--------------------------------------------------------------------------------------------------------------------|--------------------------------------------------------------------------------------------------------------------------------|----------------------------------------------------------------------------------------------------------------|-----------------------------------------------------------------|--------------------|
| <b>Global warming</b>                          | kg CO <sub>2</sub> e  | 0.231369     | 0.059719                                                                | 0.030962                                                                               | 0.013935                                        | 0.02733                                                                 | 0.002291                                                                 | 0.001757                                                                                                           | 0.002422                                                                                                                       | 0.007402                                                                                                       | 0.011212                                                        | 0.074337           |
| <b>Stratospheric ozone depletion</b>           | kg CFC11 eq           | 7.22E-08     | 1.52E-08                                                                | 2.66E-09                                                                               | 8.88E-09                                        | 6.93E-09                                                                | 2.28E-09                                                                 | 8.23E-10                                                                                                           | 1.46E-09                                                                                                                       | 5.19E-09                                                                                                       | 2.39E-09                                                        | 2.64E-08           |
| <b>Ionizing radiation</b>                      | kBq Co-60 eq          | 0.008239     | 0.003762                                                                | 0.000101                                                                               | 0.001098                                        | 0.001722                                                                | 6.83E-05                                                                 | 3.43E-05                                                                                                           | 7.51E-05                                                                                                                       | 7.69E-05                                                                                                       | 0.000172                                                        | 0.00113            |
| <b>Ozone formation, Human health</b>           | kg NO <sub>x</sub> eq | 0.00059      | 0.000144                                                                | 6.54E-05                                                                               | 3.64E-05                                        | 6.60E-05                                                                | 7.16E-06                                                                 | 9.54E-06                                                                                                           | 1.09E-05                                                                                                                       | 0.000154                                                                                                       | 3.11E-05                                                        | 6.55E-05           |
| <b>Fine particulate matter formation</b>       | kg PM2.5 eq           | 0.000309     | 8.05E-05                                                                | 4.03E-05                                                                               | 2.48E-05                                        | 3.68E-05                                                                | 3.76E-06                                                                 | 2.56E-06                                                                                                           | 3.86E-06                                                                                                                       | 4.92E-05                                                                                                       | 1.71E-05                                                        | 4.97E-05           |
| <b>Ozone formation, Terrestrial ecosystems</b> | kg NO <sub>x</sub> eq | 0.000616     | 0.000156                                                                | 6.82E-05                                                                               | 3.95E-05                                        | 7.15E-05                                                                | 7.31E-06                                                                 | 9.73E-06                                                                                                           | 1.12E-05                                                                                                                       | 0.000155                                                                                                       | 3.11E-05                                                        | 6.67E-05           |
| <b>Terrestrial acidification</b>               | kg SO <sub>2</sub> eq | 0.000757     | 0.000177                                                                | 0.000103                                                                               | 5.39E-05                                        | 8.09E-05                                                                | 8.09E-06                                                                 | 5.90E-06                                                                                                           | 8.40E-06                                                                                                                       | 0.000153                                                                                                       | 3.82E-05                                                        | 1.29E-04           |
| <b>Freshwater eutrophication</b>               | kg P eq               | 6.16E-05     | 1.67E-05                                                                | 3.06E-06                                                                               | 4.39E-06                                        | 7.64E-06                                                                | 9.11E-07                                                                 | 1.61E-07                                                                                                           | 4.48E-07                                                                                                                       | 2.91E-07                                                                                                       | 2.05E-06                                                        | 2.59E-05           |

|                                        |                          |          |          |          |          |          |          |          |          |          |          |          |
|----------------------------------------|--------------------------|----------|----------|----------|----------|----------|----------|----------|----------|----------|----------|----------|
| <b>Marine eutrophication</b>           | kg N eq                  | 1.12E-05 | 2.05E-06 | 5.71E-06 | 3.18E-07 | 9.36E-07 | 5.18E-07 | 1.29E-08 | 2.70E-08 | 2.80E-08 | 1.32E-07 | 1.50E-06 |
| <b>Terrestrial ecotoxicity</b>         | kg 1,4-DCB               | 0.431942 | 0.122469 | 0.030581 | 0.051558 | 0.056046 | 0.009578 | 0.033584 | 0.015947 | 0.019733 | 0.007407 | 0.085039 |
| <b>Freshwater ecotoxicity</b>          | kg 1,4-DCB               | 0.006321 | 0.001902 | 0.000513 | 0.000863 | 0.00087  | 0.000101 | 4.12E-05 | 0.000235 | 7.93E-05 | 0.000172 | 0.001544 |
| <b>Marine ecotoxicity</b>              | kg 1,4-DCB               | 0.008418 | 0.002504 | 0.000678 | 0.001142 | 0.001146 | 0.000133 | 7.18E-05 | 0.000311 | 0.000113 | 0.000228 | 0.002092 |
| <b>Human carcinogenic toxicity</b>     | kg 1,4-DCB               | 0.012861 | 0.001853 | 0.000937 | 0.000551 | 0.000848 | 6.80E-05 | 4.04E-05 | 0.000108 | 0.000167 | 0.000315 | 0.007974 |
| <b>Human non-carcinogenic toxicity</b> | kg 1,4-DCB               | 0.14318  | 0.041201 | 0.009599 | 0.019159 | 0.018855 | 0.002475 | 0.001353 | 0.004756 | 0.001319 | 0.005304 | 0.03916  |
| <b>Land use</b>                        | m <sup>2</sup> a crop eq | 0.005291 | 0.001952 | 8.99E-05 | 0.000457 | 0.000893 | 0.001028 | 9.62E-05 | 6.55E-05 | 2.63E-05 | 0.000134 | 0.000548 |
| <b>Mineral resource scarcity</b>       | kg Cu eq                 | 0.000738 | 0.000124 | 2.56E-05 | 0.000419 | 5.66E-05 | 6.70E-06 | 6.58E-06 | 1.16E-05 | 1.87E-05 | 4.67E-06 | 6.46E-05 |
| <b>Fossil resource scarcity</b>        | kg oil eq                | 0.083638 | 0.035288 | 0.01082  | 0.008594 | 0.016149 | 0.000646 | 0.000607 | 0.000788 | 0.002184 | 0.002177 | 0.006384 |
| <b>Water consumption</b>               | m <sup>3</sup>           | 0.002692 | 0.001018 | 0.000662 | 0.000225 | 0.000466 | 2.73E-05 | 3.24E-06 | 5.95E-06 | 4.93E-06 | 2.76E-05 | 2.52E-04 |

Environmental impacts (midpoint categories) measured using life cycle assessment modelled on one face shield (with shipping, and waste via hazardous incineration). 1,4-DCB =dichlorobenzene, CFC11= Trichlorofluoromethane, CO<sub>2</sub>e= carbon dioxide equivalents, Cu= copper, eq= equivalents, kBq Co-60 eq = kilobecquerel Cobalt-60, m<sup>2</sup>a = square meter years, N= nitrogen, NO<sub>x</sub>= nitrous oxides, P=phosphate, PM2.5 = particulate matter <2.5 micrometers, SO<sub>2</sub>= sulphur dioxide

**Supplementary Table 6: Environmental impact of one cup fit FFP respirator**

| Impact category                                | Unit                    | Total    | Textile, non-woven polypropylene {GLO}   market for textile, non woven polypropylene   Cut-off, U | Polypropylene, granulate {GLO}   market for   Cut-off, U | Polyurethane, flexible foam {RoW}   market for polyurethane, flexible foam   Cut-off, U | Synthetic rubber {GLO}   market for   Cut-off, U | Sheet rolling, aluminium {GLO}   market for   Cut-off, U | Wire drawing, steel {GLO}   market for   Cut-off, U | Corrugated board box {RoW}   market for corrugated board box   Cut-off, U | Folding boxboard/chipboard {GLO}   market for   Cut-off, U | Transport, freight, sea, container ship {GLO}   market for transport, freight, sea, container ship   Cut-off, U | Transport, freight, light commercial vehicle {GLO}   market group for transport, freight, light commercial vehicle   Cut-off, U | Transport, freight, lorry, unspecified {GLO}   market group for transport, freight, lorry, unspecified   Cut-off, U | Electricity, medium voltage {FR}   market for   Cut-off, U | Electricity, medium voltage {GB}   market for   Cut-off, U | Electricity, medium voltage {CN}   market group for   Cut-off, U | PPE clinical waste |
|------------------------------------------------|-------------------------|----------|---------------------------------------------------------------------------------------------------|----------------------------------------------------------|-----------------------------------------------------------------------------------------|--------------------------------------------------|----------------------------------------------------------|-----------------------------------------------------|---------------------------------------------------------------------------|------------------------------------------------------------|-----------------------------------------------------------------------------------------------------------------|---------------------------------------------------------------------------------------------------------------------------------|---------------------------------------------------------------------------------------------------------------------|------------------------------------------------------------|------------------------------------------------------------|------------------------------------------------------------------|--------------------|
| <b>Global warming</b>                          | kg CO <sub>2e</sub>     | 0.125163 | 0.026924                                                                                          | 0.008633                                                 | 0.014457                                                                                | 0.007179                                         | 0.000741                                                 | 0.000109                                            | 0.001956                                                                  | 0.00645                                                    | 0.002428                                                                                                        | 0.001589                                                                                                                        | 0.001153                                                                                                            | 0.000167                                                   | 0.000722                                                   | 0.002023                                                         | 0.049969           |
| <b>Stratospheric ozone depletion</b>           | kg CFC11 eq             | 4.26E-08 | 7.69E-09                                                                                          | 1.54E-09                                                 | 1.24E-09                                                                                | 4.58E-09                                         | 2.58E-10                                                 | 3.96E-11                                            | 1.95E-09                                                                  | 3.21E-09                                                   | 1.70E-09                                                                                                        | 9.60E-10                                                                                                                        | 5.40E-10                                                                                                            | 2.31E-10                                                   | 3.71E-10                                                   | 4.31E-10                                                         | 1.78E-08           |
| <b>Ionizing radiation</b>                      | kBq Co-60 eq            | 0.005289 | 0.001537                                                                                          | 0.000173                                                 | 4.71E-05                                                                                | 0.000566                                         | 5.52E-05                                                 | 3.88E-06                                            | 5.83E-05                                                                  | 0.000453                                                   | 2.52E-05                                                                                                        | 4.93E-05                                                                                                                        | 2.25E-05                                                                                                            | 0.00108                                                    | 4.16E-04                                                   | 3.10E-05                                                         | 0.000759           |
| <b>Ozone formation, Human health</b>           | kg NO <sub>x</sub> eq   | 0.000273 | 6.38E-05                                                                                          | 1.78E-05                                                 | 3.05E-05                                                                                | 1.88E-05                                         | 1.68E-06                                                 | 1.95E-07                                            | 6.11E-06                                                                  | 1.75E-05                                                   | 5.05E-05                                                                                                        | 7.13E-06                                                                                                                        | 6.26E-06                                                                                                            | 3.08E-07                                                   | 1.26E-06                                                   | 5.60E-06                                                         | 4.40E-05           |
| <b>Fine particulate matter formation</b>       | kg PM <sub>2.5</sub> eq | 0.000152 | 3.58E-05                                                                                          | 9.03E-06                                                 | 1.88E-05                                                                                | 1.28E-05                                         | 1.41E-06                                                 | 1.67E-07                                            | 3.21E-06                                                                  | 1.23E-05                                                   | 1.61E-05                                                                                                        | 2.54E-06                                                                                                                        | 1.68E-06                                                                                                            | 1.94E-07                                                   | 5.85E-07                                                   | 3.09E-06                                                         | 3.34E-05           |
| <b>Ozone formation, Terrestrial ecosystems</b> | kg NO <sub>x</sub> eq   | 0.000282 | 6.69E-05                                                                                          | 1.89E-05                                                 | 3.18E-05                                                                                | 2.04E-05                                         | 1.76E-06                                                 | 2.04E-07                                            | 6.24E-06                                                                  | 1.78E-05                                                   | 5.09E-05                                                                                                        | 7.35E-06                                                                                                                        | 6.38E-06                                                                                                            | 3.14E-07                                                   | 1.27E-06                                                   | 5.62E-06                                                         | 4.48E-05           |
| <b>Terrestrial acidification</b>               | kg SO <sub>2</sub> eq   | 0.000372 | 8.07E-05                                                                                          | 2.34E-05                                                 | 4.80E-05                                                                                | 2.78E-05                                         | 2.48E-06                                                 | 2.88E-07                                            | 6.91E-06                                                                  | 2.59E-05                                                   | 5.01E-05                                                                                                        | 5.51E-06                                                                                                                        | 3.87E-06                                                                                                            | 4.63E-07                                                   | 1.70E-06                                                   | 6.90E-06                                                         | 8.65E-05           |
| <b>Freshwater eutrophication</b>               | kg P eq                 | 3.45E-05 | 7.24E-06                                                                                          | 1.54E-06                                                 | 1.43E-06                                                                                | 2.26E-06                                         | 2.90E-07                                                 | 5.77E-08                                            | 7.78E-07                                                                  | 2.26E-06                                                   | 9.55E-08                                                                                                        | 2.94E-07                                                                                                                        | 1.06E-07                                                                                                            | 4.99E-08                                                   | 1.52E-07                                                   | 3.69E-07                                                         | 1.74E-05           |
| <b>Marine eutrophication</b>                   | kg N eq                 | 5.64E-06 | 6.55E-07                                                                                          | 1.27E-07                                                 | 2.67E-06                                                                                | 1.64E-07                                         | 2.44E-08                                                 | 8.03E-09                                            | 4.42E-07                                                                  | 4.34E-07                                                   | 9.17E-09                                                                                                        | 1.77E-08                                                                                                                        | 8.45E-09                                                                                                            | 2.26E-08                                                   | 1.71E-08                                                   | 2.39E-08                                                         | 1.01E-06           |
| <b>Terrestrial ecotoxicity</b>                 | kg 1,4-DCB              | 0.246403 | 0.062767                                                                                          | 0.016589                                                 | 0.014279                                                                                | 0.02656                                          | 0.000851                                                 | 0.000197                                            | 0.008177                                                                  | 0.016734                                                   | 0.006473                                                                                                        | 0.010463                                                                                                                        | 0.022035                                                                                                            | 0.000719                                                   | 0.000786                                                   | 0.001336                                                         | 0.057163           |
| <b>Freshwater ecotoxicity</b>                  | kg 1,4-DCB              | 0.003614 | 0.00105                                                                                           | 0.000253                                                 | 0.000239                                                                                | 0.000445                                         | 3.35E-05                                                 | 5.57E-06                                            | 8.67E-05                                                                  | 0.000172                                                   | 2.60E-05                                                                                                        | 0.000154                                                                                                                        | 2.70E-05                                                                                                            | 1.47E-05                                                   | 1.91E-05                                                   | 3.11E-05                                                         | 0.001038           |



|                                        |                          |          |          |          |          |          |          |          |          |          |          |          |          |          |          |          |          |
|----------------------------------------|--------------------------|----------|----------|----------|----------|----------|----------|----------|----------|----------|----------|----------|----------|----------|----------|----------|----------|
| <b>Marine ecotoxicity</b>              | kg 1,4-DCB               | 0.004795 | 0.001362 | 0.00033  | 0.000316 | 0.000588 | 4.33E-05 | 7.49E-06 | 0.000114 | 0.000229 | 3.71E-05 | 0.000204 | 4.71E-05 | 1.86E-05 | 2.60E-05 | 4.11E-05 | 0.001406 |
| <b>Human carcinogenic toxicity</b>     | kg 1,4-DCB               | 0.007786 | 0.000835 | 0.000226 | 0.000437 | 0.000284 | 5.48E-05 | 8.37E-05 | 5.80E-05 | 0.000196 | 5.48E-05 | 7.10E-05 | 2.65E-05 | 7.94E-06 | 1.70E-05 | 5.68E-05 | 0.00536  |
| <b>Human non-carcinogenic toxicity</b> | kg 1,4-DCB               | 0.078678 | 0.018525 | 0.00476  | 0.004482 | 0.00987  | 0.000636 | 0.000133 | 0.002113 | 0.005382 | 0.000433 | 0.00312  | 0.000888 | 0.00026  | 0.00043  | 0.000957 | 0.026323 |
| <b>Land use</b>                        | m <sup>2</sup> a crop eq | 0.004457 | 0.000319 | 6.93E-05 | 4.20E-05 | 0.000236 | 9.44E-06 | 4.17E-06 | 0.000878 | 0.0023   | 8.63E-06 | 4.30E-05 | 6.31E-05 | 7.47E-06 | 8.00E-05 | 2.42E-05 | 0.000368 |
| <b>Mineral resource scarcity</b>       | kg Cu eq                 | 0.000414 | 7.23E-05 | 2.11E-05 | 1.20E-05 | 0.000216 | 2.80E-06 | 2.47E-06 | 5.72E-06 | 1.50E-05 | 6.13E-06 | 7.58E-06 | 4.31E-06 | 1.40E-06 | 9.11E-07 | 8.42E-07 | 4.34E-05 |
| <b>Fossil resource scarcity</b>        | kg oil eq                | 0.042231 | 0.016966 | 0.006246 | 0.005052 | 0.004427 | 0.00019  | 2.03E-05 | 0.000551 | 0.001693 | 0.000717 | 0.000517 | 0.000398 | 4.65E-05 | 0.000244 | 0.000393 | 0.004292 |
| <b>Water consumption</b>               | m <sup>3</sup>           | 0.00107  | 0.000257 | 7.53E-05 | 0.000309 | 0.000116 | 5.75E-06 | 5.17E-06 | 2.33E-05 | 8.05E-05 | 1.62E-06 | 3.91E-06 | 2.12E-06 | 6.38E-06 | 3.16E-06 | 4.97E-06 | 1.69E-04 |

Environmental impacts (midpoint categories) measured using life cycle assessment modelled on one cup fit respirator (with shipping, and waste via hazardous incineration). 1,4-DCB =dichlorobenzene, CFC11= Trichlorofluoromethane, CO<sub>2</sub>e= carbon dioxide equivalents, Cu= copper, eq= equivalents, FFP= filtering facepiece, kBq Co-60 eq = kilobecquerel Cobalt-60, m<sup>2</sup>a = square meter years, N= nitrogen, NO<sub>x</sub>= nitrous oxides, P=phosphate, PM2.5 = particulate matter <2.5 micrometers, SO<sub>2</sub>= sulphur dioxide

**Supplementary Table 7: Environmental impact of one duckbill FFP respirator**

| Impact category                                | Unit                  | Total    | Textile, non-woven polypropylene {GLO} market for textile, non woven polypropylene   Cut-off; U | Synthetic rubber {GLO} market for   Cut-off; U | Polyurethane, flexible foam {RoW} market for polyurethane, flexible foam   Cut-off; U | Wire drawing, steel {GLO} market for   Cut-off; U | Corrugated board box {RoW} market for corrugated board box   Cut-off; U | Folding boxboard/chipboard {GLO} market for   Cut-off; U | Packaging film, low density polyethylene {GLO} market for   Cut-off; U | Transport, freight, sea, container ship {GLO} market for transport, freight, sea, container ship   Cut-off; U | Transport, freight, light commercial vehicle {GLO} market group for transport, freight, light commercial vehicle   Cut-off; U | Transport, freight, lorry, unspecified {GLO} market group for transport, freight, lorry, unspecified   Cut-off; U | Electricity, medium voltage {CN} market group for   Cut-off; U | Electricity, medium voltage {FR} market for   Cut-off; U | Electricity, medium voltage {GB} market for   Cut-off; U | PPE clinical waste |
|------------------------------------------------|-----------------------|----------|-------------------------------------------------------------------------------------------------|------------------------------------------------|---------------------------------------------------------------------------------------|---------------------------------------------------|-------------------------------------------------------------------------|----------------------------------------------------------|------------------------------------------------------------------------|---------------------------------------------------------------------------------------------------------------|-------------------------------------------------------------------------------------------------------------------------------|-------------------------------------------------------------------------------------------------------------------|----------------------------------------------------------------|----------------------------------------------------------|----------------------------------------------------------|--------------------|
| <b>Global warming</b>                          | kg CO <sub>2</sub> e  | 0.07635  | 0.024853                                                                                        | 0.002168                                       | 0.004838                                                                              | 0.000163                                          | 0.001956                                                                | 0.006445                                                 | 0.004029                                                               | 0.00172                                                                                                       | 0.001126                                                                                                                      | 0.000817                                                                                                          | 1.08E-03                                                       | 8.93E-05                                                 | 0.000386                                                 | 0.026681           |
| <b>Stratospheric ozone depletion</b>           | kg CFC11 eq           | 2.74E-08 | 7.10E-09                                                                                        | 1.38E-09                                       | 4.15E-10                                                                              | 5.94E-11                                          | 1.95E-09                                                                | 3.21E-09                                                 | 1.02E-09                                                               | 1.21E-09                                                                                                      | 6.80E-10                                                                                                                      | 3.82E-10                                                                                                          | 2.30E-10                                                       | 1.23E-10                                                 | 1.98E-10                                                 | 9.48E-09           |
| <b>Ionizing radiation</b>                      | kBq Co-60 eq          | 0.003665 | 0.001419                                                                                        | 0.000171                                       | 1.58E-05                                                                              | 5.82E-06                                          | 5.83E-05                                                                | 0.000452                                                 | 2.54E-04                                                               | 1.79E-05                                                                                                      | 3.49E-05                                                                                                                      | 1.60E-05                                                                                                          | 1.66E-05                                                       | 0.000577                                                 | 0.000222                                                 | 0.000405           |
| <b>Ozone formation, Human health</b>           | kg NO <sub>x</sub> eq | 0.000181 | 5.89E-05                                                                                        | 5.66E-06                                       | 1.02E-05                                                                              | 2.93E-07                                          | 6.11E-06                                                                | 1.75E-05                                                 | 9.73E-06                                                               | 3.58E-05                                                                                                      | 5.05E-06                                                                                                                      | 4.43E-06                                                                                                          | 2.99E-06                                                       | 1.64E-07                                                 | 6.74E-07                                                 | 2.35E-05           |
| <b>Fine particulate matter formation</b>       | kg PM2.5 eq           | 9.88E-05 | 3.31E-05                                                                                        | 3.86E-06                                       | 6.29E-06                                                                              | 2.50E-07                                          | 3.21E-06                                                                | 1.23E-05                                                 | 5.43E-06                                                               | 1.14E-05                                                                                                      | 1.80E-06                                                                                                                      | 1.19E-06                                                                                                          | 1.65E-06                                                       | 1.03E-07                                                 | 3.13E-07                                                 | 1.78E-05           |
| <b>Ozone formation, Terrestrial ecosystems</b> | kg NO <sub>x</sub> eq | 0.000187 | 6.18E-05                                                                                        | 6.14E-06                                       | 1.07E-05                                                                              | 3.06E-07                                          | 6.24E-06                                                                | 1.77E-05                                                 | 1.05E-05                                                               | 3.60E-05                                                                                                      | 5.21E-06                                                                                                                      | 4.52E-06                                                                                                          | 3.00E-06                                                       | 1.67E-07                                                 | 6.81E-07                                                 | 2.39E-05           |
| <b>Terrestrial acidification</b>               | kg SO <sub>2</sub> eq | 0.000237 | 7.45E-05                                                                                        | 8.38E-06                                       | 1.61E-05                                                                              | 4.33E-07                                          | 6.91E-06                                                                | 2.58E-05                                                 | 1.19E-05                                                               | 3.55E-05                                                                                                      | 3.91E-06                                                                                                                      | 2.74E-06                                                                                                          | 3.68E-06                                                       | 2.47E-07                                                 | 9.09E-07                                                 | 4.62E-05           |
| <b>Freshwater eutrophication</b>               | kg P eq               | 2.21E-05 | 6.68E-06                                                                                        | 6.83E-07                                       | 4.78E-07                                                                              | 8.65E-08                                          | 7.78E-07                                                                | 2.26E-06                                                 | 1.13E-06                                                               | 6.76E-08                                                                                                      | 2.08E-07                                                                                                                      | 7.51E-08                                                                                                          | 1.97E-07                                                       | 2.66E-08                                                 | 8.11E-08                                                 | 9.31E-06           |
| <b>Marine eutrophication</b>                   | kg N eq               | 3.17E-06 | 6.05E-07                                                                                        | 4.95E-08                                       | 8.93E-07                                                                              | 1.21E-08                                          | 4.42E-07                                                                | 4.33E-07                                                 | 1.38E-07                                                               | 6.50E-09                                                                                                      | 1.26E-08                                                                                                                      | 5.99E-09                                                                                                          | 1.28E-08                                                       | 1.21E-08                                                 | 9.14E-09                                                 | 5.39E-07           |
| <b>Terrestrial ecotoxicity</b>                 | kg 1,4-DCB            | 0.16384  | 0.057939                                                                                        | 0.00802                                        | 0.004778                                                                              | 0.000296                                          | 0.008177                                                                | 0.016719                                                 | 0.008262                                                               | 0.004586                                                                                                      | 0.007413                                                                                                                      | 0.015611                                                                                                          | 0.000713                                                       | 0.000384                                                 | 0.00042                                                  | 0.030522           |
| <b>Freshwater ecotoxicity</b>                  | kg 1,4-DCB            | 0.002314 | 0.000969                                                                                        | 0.000134                                       | 8.01E-05                                                                              | 8.36E-06                                          | 8.67E-05                                                                | 0.000171                                                 | 1.28E-04                                                               | 1.84E-05                                                                                                      | 0.000109                                                                                                                      | 1.91E-05                                                                                                          | 1.66E-05                                                       | 7.84E-06                                                 | 1.02E-05                                                 | 0.000554           |
| <b>Marine ecotoxicity</b>                      | kg 1,4-DCB            | 0.003064 | 0.001257                                                                                        | 0.000178                                       | 0.000106                                                                              | 1.12E-05                                          | 0.000114                                                                | 0.000229                                                 | 0.000169                                                               | 2.63E-05                                                                                                      | 0.000145                                                                                                                      | 3.34E-05                                                                                                          | 2.19E-05                                                       | 9.94E-06                                                 | 1.39E-05                                                 | 0.000751           |
| <b>Human carcinogenic toxicity</b>             | kg 1,4-DCB            | 0.004521 | 0.00077                                                                                         | 8.56E-05                                       | 0.000146                                                                              | 1.26E-04                                          | 5.80E-05                                                                | 0.000196                                                 | 0.000125                                                               | 3.88E-05                                                                                                      | 5.03E-05                                                                                                                      | 1.88E-05                                                                                                          | 3.03E-05                                                       | 4.24E-06                                                 | 9.10E-06                                                 | 0.002862           |

|                                        |                          |          |          |          |          |          |          |          |          |          |          |          |          |          |          |          |
|----------------------------------------|--------------------------|----------|----------|----------|----------|----------|----------|----------|----------|----------|----------|----------|----------|----------|----------|----------|
| <b>Human non-carcinogenic toxicity</b> | kg 1,4-DCB               | 0.05013  | 0.0171   | 0.00298  | 0.0015   | 0.0002   | 0.002113 | 0.005377 | 0.002779 | 0.000307 | 0.002211 | 0.000629 | 0.000511 | 0.000139 | 0.00023  | 0.014055 |
| <b>Land use</b>                        | m <sup>2</sup> a crop eq | 0.004031 | 0.000294 | 7.11E-05 | 1.40E-05 | 6.25E-06 | 0.000878 | 0.002298 | 1.32E-04 | 6.12E-06 | 3.04E-05 | 4.47E-05 | 1.29E-05 | 3.99E-06 | 4.27E-05 | 1.97E-04 |
| <b>Mineral resource scarcity</b>       | kg Cu eq                 | 0.000206 | 6.67E-05 | 6.52E-05 | 4.00E-06 | 3.70E-06 | 5.72E-06 | 1.50E-05 | 8.35E-06 | 4.34E-06 | 5.37E-06 | 3.06E-06 | 4.50E-07 | 7.46E-07 | 4.86E-07 | 2.32E-05 |
| <b>Fossil resource scarcity</b>        | kg oil eq                | 0.027154 | 0.015661 | 0.001337 | 0.001691 | 3.05E-05 | 0.000551 | 0.001691 | 0.00238  | 0.000508 | 0.000366 | 0.000282 | 2.10E-04 | 2.48E-05 | 0.00013  | 0.002292 |
| <b>Water consumption</b>               | m <sup>3</sup>           | 0.00066  | 0.000237 | 3.51E-05 | 0.000104 | 7.76E-06 | 2.33E-05 | 8.04E-05 | 6.87E-05 | 1.15E-06 | 2.77E-06 | 1.50E-06 | 2.66E-06 | 3.41E-06 | 1.69E-06 | 9.04E-05 |

Environmental impacts (midpoint categories) measured using life cycle assessment modelled on one duckbill FFP respirator (with shipping, and waste via hazardous incineration). 1,4-DCB =dichlorobenzene, CFC11= Trichlorofluoromethane, CO<sub>2</sub>e= carbon dioxide equivalents, Cu= copper, eq= equivalents, FFP=filtering facepiece, kBq Co-60 eq = kilobecquerel Cobalt-60, m<sup>2</sup>a = square meter years, N= nitrogen, NO<sub>x</sub>= nitrous oxides, P=phosphate, PM2.5 = particulate matter <2.5 micrometers, SO<sub>2</sub>= sulphur dioxide

**Supplementary Table 8: Environmental impact of one glove**

| Impact category                                | Unit                     | Total    | Synthetic rubber {GLO}   market for   Cut-off, U | Corrugated board box {RoW}   market for corrugated board box   Cut-off, U | Folding boxboard/chipboard {GLO}   market for   Cut-off, U | Transport, freight, lorry, unspecified {GLO}   market group for transport, freight, lorry, unspecified   Cut-off, U | Transport, freight, light commercial vehicle {GLO}   market group for transport, freight, light commercial vehicle   Cut-off, U | Transport, freight, sea, container ship {GLO}   market for transport, freight, sea, container ship   Cut-off, U | Electricity, medium voltage {MY}   market for   Cut-off, U | PPE clinical waste |
|------------------------------------------------|--------------------------|----------|--------------------------------------------------|---------------------------------------------------------------------------|------------------------------------------------------------|---------------------------------------------------------------------------------------------------------------------|---------------------------------------------------------------------------------------------------------------------------------|-----------------------------------------------------------------------------------------------------------------|------------------------------------------------------------|--------------------|
| <b>Global warming</b>                          | kg CO <sub>2</sub> e     | 0.02624  | 0.009079                                         | 0.000127                                                                  | 0.000234                                                   | 0.000154                                                                                                            | 0.000212                                                                                                                        | 0.000505                                                                                                        | 0.00764                                                    | 0.00829            |
| <b>Stratospheric ozone depletion</b>           | kg CFC11 eq              | 1.17E-08 | 5.79E-09                                         | 1.27E-10                                                                  | 1.16E-10                                                   | 7.21E-11                                                                                                            | 1.28E-10                                                                                                                        | 3.54E-10                                                                                                        | 2.12E-09                                                   | 2.95E-09           |
| <b>Ionizing radiation</b>                      | kBq Co-60 eq             | 0.000889 | 0.000716                                         | 3.79E-06                                                                  | 1.64E-05                                                   | 3.01E-06                                                                                                            | 6.58E-06                                                                                                                        | 5.24E-06                                                                                                        | 1.24E-05                                                   | 1.26E-04           |
| <b>Ozone formation, Human health</b>           | kg NO <sub>x</sub> eq    | 5.63E-05 | 2.37E-05                                         | 3.98E-07                                                                  | 6.34E-07                                                   | 8.36E-07                                                                                                            | 9.52E-07                                                                                                                        | 1.05E-05                                                                                                        | 1.19E-05                                                   | 7.31E-06           |
| <b>Fine particulate matter formation</b>       | kg PM <sub>2.5</sub> eq  | 4.55E-05 | 1.62E-05                                         | 2.09E-07                                                                  | 4.47E-07                                                   | 2.24E-07                                                                                                            | 3.39E-07                                                                                                                        | 3.35E-06                                                                                                        | 1.92E-05                                                   | 5.55E-06           |
| <b>Ozone formation, Terrestrial ecosystems</b> | kg NO <sub>x</sub> eq    | 5.87E-05 | 2.57E-05                                         | 4.06E-07                                                                  | 6.43E-07                                                   | 8.52E-07                                                                                                            | 9.82E-07                                                                                                                        | 1.06E-05                                                                                                        | 1.21E-05                                                   | 7.44E-06           |
| <b>Terrestrial acidification</b>               | kg SO <sub>2</sub> eq    | 8.77E-05 | 3.51E-05                                         | 4.50E-07                                                                  | 9.36E-07                                                   | 5.17E-07                                                                                                            | 7.36E-07                                                                                                                        | 1.04E-05                                                                                                        | 2.51E-05                                                   | 1.44E-05           |
| <b>Freshwater eutrophication</b>               | kg P eq                  | 9.22E-06 | 2.86E-06                                         | 5.06E-08                                                                  | 8.17E-08                                                   | 1.41E-08                                                                                                            | 3.93E-08                                                                                                                        | 1.98E-08                                                                                                        | 3.26E-06                                                   | 2.89E-06           |
| <b>Marine eutrophication</b>                   | kg N eq                  | 6.41E-07 | 2.07E-07                                         | 2.88E-08                                                                  | 1.57E-08                                                   | 1.13E-09                                                                                                            | 2.37E-09                                                                                                                        | 1.91E-09                                                                                                        | 2.17E-07                                                   | 1.67E-07           |
| <b>Terrestrial ecotoxicity</b>                 | kg 1,4-DCB               | 0.054753 | 0.033591                                         | 0.000532                                                                  | 0.000606                                                   | 0.002942                                                                                                            | 0.001397                                                                                                                        | 0.001346                                                                                                        | 0.004857                                                   | 0.009483           |
| <b>Freshwater ecotoxicity</b>                  | kg 1,4-DCB               | 0.000941 | 0.000562                                         | 5.64E-06                                                                  | 6.21E-06                                                   | 3.61E-06                                                                                                            | 2.06E-05                                                                                                                        | 5.41E-06                                                                                                        | 0.000165                                                   | 0.000172           |
| <b>Marine ecotoxicity</b>                      | kg 1,4-DCB               | 0.001255 | 0.000744                                         | 7.39E-06                                                                  | 8.28E-06                                                   | 6.29E-06                                                                                                            | 2.73E-05                                                                                                                        | 7.72E-06                                                                                                        | 0.000221                                                   | 0.000233           |
| <b>Human carcinogenic toxicity</b>             | kg 1,4-DCB               | 0.001555 | 0.000359                                         | 3.78E-06                                                                  | 7.11E-06                                                   | 3.54E-06                                                                                                            | 9.48E-06                                                                                                                        | 1.14E-05                                                                                                        | 0.000272                                                   | 0.000889           |
| <b>Human non-carcinogenic toxicity</b>         | kg 1,4-DCB               | 0.023014 | 0.012482                                         | 0.000137                                                                  | 0.000195                                                   | 0.000119                                                                                                            | 0.000417                                                                                                                        | 9.00E-05                                                                                                        | 0.005207                                                   | 0.004367           |
| <b>Land use</b>                                | m <sup>2</sup> a crop eq | 0.000582 | 0.000298                                         | 5.71E-05                                                                  | 8.33E-05                                                   | 8.42E-06                                                                                                            | 5.74E-06                                                                                                                        | 1.79E-06                                                                                                        | 6.69E-05                                                   | 6.11E-05           |
| <b>Mineral resource scarcity</b>               | kg Cu eq                 | 0.000288 | 0.000273                                         | 3.72E-07                                                                  | 5.44E-07                                                   | 5.76E-07                                                                                                            | 1.01E-06                                                                                                                        | 1.27E-06                                                                                                        | 3.37E-06                                                   | 7.20E-06           |
| <b>Fossil resource scarcity</b>                | kg oil eq                | 0.008677 | 0.005599                                         | 3.59E-05                                                                  | 6.13E-05                                                   | 5.32E-05                                                                                                            | 6.90E-05                                                                                                                        | 0.000149                                                                                                        | 0.001998                                                   | 0.000712           |
| <b>Water consumption</b>                       | m <sup>3</sup>           | 0.000232 | 0.000147                                         | 1.52E-06                                                                  | 2.91E-06                                                   | 2.84E-07                                                                                                            | 5.21E-07                                                                                                                        | 3.36E-07                                                                                                        | 5.18E-05                                                   | 2.81E-05           |

Environmental impacts (midpoint categories) measured using life cycle assessment modelled on one glove (with shipping, and waste via hazardous incineration). 1,4-DCB =dichlorobenzene, CFC11= Trichlorofluoromethane, CO<sub>2</sub>e= carbon dioxide equivalents, Cu= copper, eq= equivalents, kBq Co-60 eq = kilobecquerel Cobalt-60, m<sup>2</sup>a = square meter years, N= nitrogen, NO<sub>x</sub>= nitrous oxides, P=phosphate, PM2.5 = particulate matter <2.5 micrometers, SO<sub>2</sub>= sulphur dioxide

**Supplementary Table 9: Environmental impact of one disposable gown**

| Impact category                         | Unit                  | Total    | Textile, non-woven polypropylene {GLO}   market for textile, non woven polypropylene   Cut-off, U | Synthetic rubber {GLO}   market for   Cut-off, U | Packaging film, low density polyethylene {GLO}   market for   Cut-off, U | Kraft paper, bleached {GLO}   market for   Cut-off, U | Corrugated board box {RoW}   market for corrugated board box   Cut-off, U | Transport, freight, sea, container ship {GLO}   market for transport, freight, sea, container ship   Cut-off, S | Transport, freight, light commercial vehicle {GLO}   market group for transport, freight, light commercial vehicle   Cut-off, U | Transport, freight, lorry, unspecified {GLO}   market group for transport, freight, lorry, unspecified   Cut-off, U | Electricity, medium voltage {CN}   market group for   Cut-off, U | Electricity, medium voltage {EG}   market for electricity, medium voltage   Cut-off, U | Electricity, medium voltage {DE}   market for   Cut-off, U | PPE clinical waste |
|-----------------------------------------|-----------------------|----------|---------------------------------------------------------------------------------------------------|--------------------------------------------------|--------------------------------------------------------------------------|-------------------------------------------------------|---------------------------------------------------------------------------|-----------------------------------------------------------------------------------------------------------------|---------------------------------------------------------------------------------------------------------------------------------|---------------------------------------------------------------------------------------------------------------------|------------------------------------------------------------------|----------------------------------------------------------------------------------------|------------------------------------------------------------|--------------------|
| Global warming                          | kg CO <sub>2</sub> e  | 0.905431 | 0.404429                                                                                          | 0.021734                                         | 0.014277                                                                 | 0.00956                                               | 0.012208                                                                  | 0.020126                                                                                                        | 0.010184                                                                                                                        | 0.007387                                                                                                            | 0.026729                                                         | 0.006958                                                                               | 0.005253                                                   | 0.366184           |
| Stratospheric ozone depletion           | kg CFC11 eq           | 3.18E-07 | 1.16E-07                                                                                          | 1.39E-08                                         | 3.62E-09                                                                 | 5.42E-09                                              | 1.22E-08                                                                  | 1.41E-08                                                                                                        | 6.15E-09                                                                                                                        | 3.46E-09                                                                                                            | 5.70E-09                                                         | 3.44E-09                                                                               | 3.71E-09                                                   | 1.30E-07           |
| Ionizing radiation                      | kBq Co-60 eq          | 0.034539 | 0.023092                                                                                          | 0.001713                                         | 0.000899                                                                 | 0.000851                                              | 0.000364                                                                  | 0.000209                                                                                                        | 0.000316                                                                                                                        | 0.000144                                                                                                            | 0.00041                                                          | 2.61E-05                                                                               | 0.000954                                                   | 0.005564           |
| Ozone formation, Human health           | kg NO <sub>x</sub> eq | 0.00204  | 0.000959                                                                                          | 5.68E-05                                         | 3.45E-05                                                                 | 3.26E-05                                              | 3.82E-05                                                                  | 0.000419                                                                                                        | 4.57E-05                                                                                                                        | 4.01E-05                                                                                                            | 7.40E-05                                                         | 1.13E-05                                                                               | 5.42E-06                                                   | 0.000323           |
| Fine particulate matter formation       | kg PM2.5 eq           | 0.001098 | 0.000538                                                                                          | 3.87E-05                                         | 1.92E-05                                                                 | 2.63E-05                                              | 2.01E-05                                                                  | 0.000134                                                                                                        | 1.62E-05                                                                                                                        | 1.08E-05                                                                                                            | 4.08E-05                                                         | 5.35E-06                                                                               | 2.78E-06                                                   | 2.45E-04           |
| Ozone formation, Terrestrial ecosystems | kg NO <sub>x</sub> eq | 0.002107 | 0.001005                                                                                          | 6.16E-05                                         | 3.73E-05                                                                 | 3.32E-05                                              | 3.89E-05                                                                  | 0.000422                                                                                                        | 4.71E-05                                                                                                                        | 4.09E-05                                                                                                            | 7.42E-05                                                         | 1.15E-05                                                                               | 5.48E-06                                                   | 0.000329           |
| Terrestrial acidification               | kg SO <sub>2</sub> eq | 0.002644 | 0.001212                                                                                          | 8.41E-05                                         | 4.23E-05                                                                 | 3.45E-05                                              | 4.31E-05                                                                  | 0.000415                                                                                                        | 3.53E-05                                                                                                                        | 2.48E-05                                                                                                            | 9.11E-05                                                         | 1.65E-05                                                                               | 9.02E-06                                                   | 0.000634           |
| Freshwater eutrophication               | kg P eq               | 0.000272 | 0.000109                                                                                          | 6.85E-06                                         | 3.99E-06                                                                 | 3.79E-06                                              | 4.85E-06                                                                  | 7.91E-07                                                                                                        | 1.89E-06                                                                                                                        | 6.79E-07                                                                                                            | 4.88E-06                                                         | 1.18E-07                                                                               | 7.41E-06                                                   | 1.28E-04           |
| Marine eutrophication                   | kg N eq               | 2.25E-05 | 9.84E-06                                                                                          | 4.96E-07                                         | 4.89E-07                                                                 | 5.29E-07                                              | 2.76E-06                                                                  | 7.60E-08                                                                                                        | 1.14E-07                                                                                                                        | 5.42E-08                                                                                                            | 3.16E-07                                                         | 1.06E-08                                                                               | 4.74E-07                                                   | 7.39E-06           |
| Terrestrial ecotoxicity                 | kg 1,4-DCB            | 1.849938 | 0.942835                                                                                          | 0.080409                                         | 0.029279                                                                 | 0.031426                                              | 0.051025                                                                  | 0.053655                                                                                                        | 0.067043                                                                                                                        | 0.141189                                                                                                            | 0.017658                                                         | 0.010597                                                                               | 0.003274                                                   | 0.418905           |
| Freshwater ecotoxicity                  | kg 1,4-DCB            | 0.028206 | 0.015775                                                                                          | 0.001346                                         | 0.000455                                                                 | 0.000312                                              | 0.000541                                                                  | 0.000216                                                                                                        | 0.000989                                                                                                                        | 0.000173                                                                                                            | 0.000411                                                         | 8.79E-05                                                                               | 0.000257                                                   | 0.007606           |
| Marine ecotoxicity                      | kg 1,4-DCB            | 0.037237 | 0.020456                                                                                          | 0.001781                                         | 0.000599                                                                 | 0.000417                                              | 0.000709                                                                  | 0.000308                                                                                                        | 0.001309                                                                                                                        | 0.000302                                                                                                            | 0.000543                                                         | 0.000115                                                                               | 0.000343                                                   | 0.010304           |

|                                        |                          |          |          |          |          |          |          |          |          |          |          |          |          |          |
|----------------------------------------|--------------------------|----------|----------|----------|----------|----------|----------|----------|----------|----------|----------|----------|----------|----------|
| <b>Human carcinogenic toxicity</b>     | kg 1,4-DCB               | 0.056156 | 0.012537 | 0.000859 | 0.000443 | 0.000415 | 0.000362 | 0.000454 | 0.000455 | 0.00017  | 0.000751 | 3.72E-05 | 0.000378 | 0.03928  |
| <b>Human non-carcinogenic toxicity</b> | kg 1,4-DCB               | 0.583373 | 0.278272 | 0.02988  | 0.00985  | 0.007697 | 0.013184 | 0.003587 | 0.019995 | 0.00569  | 0.012643 | 0.000802 | 0.008112 | 0.1929   |
| <b>Land use</b>                        | m <sup>2</sup> a crop eq | 0.024286 | 0.004788 | 0.000713 | 0.000467 | 0.008952 | 0.005479 | 7.16E-05 | 0.000275 | 0.000404 | 0.00032  | 9.69E-06 | 9.96E-05 | 0.002698 |
| <b>Mineral resource scarcity</b>       | kg Cu eq                 | 0.002298 | 0.001086 | 6.54E-04 | 2.96E-05 | 2.65E-05 | 3.57E-05 | 5.08E-05 | 4.86E-05 | 2.76E-05 | 1.11E-05 | 3.34E-06 | 4.86E-06 | 0.000318 |
| <b>Fossil resource scarcity</b>        | kg oil eq                | 0.335342 | 0.254846 | 0.013402 | 0.008436 | 0.002754 | 0.00344  | 0.005939 | 0.003314 | 0.002551 | 0.00519  | 0.002625 | 0.001263 | 0.03145  |
| <b>Water consumption</b>               | m <sup>3</sup>           | 0.006301 | 0.003863 | 0.000351 | 0.000243 | 0.000296 | 0.000146 | 1.34E-05 | 2.50E-05 | 1.36E-05 | 6.57E-05 | 1.41E-05 | 2.94E-05 | 0.00124  |

Environmental impacts (midpoint categories) measured using life cycle assessment modelled on one gown (with shipping, and waste via hazardous incineration). 1,4-DCB =dichlorobenzene, CFC11= Trichlorofluoromethane, CO<sub>2</sub>e= carbon dioxide equivalents, Cu= copper, eq= equivalents, kBq Co-60 eq = kilobecquerel Cobalt-60, m<sup>2</sup>a = square meter years, N= nitrogen, NO<sub>x</sub>= nitrous oxides, P=phosphate, PM2.5 = particulate matter <2.5 micrometers, SO<sub>2</sub>= sulphur dioxide

**Supplementary Table 10: Environmental impact of one surgical mask (Type II)**

| Impact category                      | Unit                  | Total    | Textile, non-woven polypropylene {GLO}   market for textile, non woven polypropylene   Cut-off, U | Synthetic rubber {GLO}   market for   Cut-off, U | Sheet rolling, aluminium {GLO}   market for   Cut-off, U | Corrugated board box {RoW}   market for corrugated board box   Cut-off, U | Folding boxboard/chipboard {GLO}   market for   Cut-off, U | Transport, freight, lorry, unspecified {GLO}   market group for transport, freight, lorry, unspecified   Cut-off, U | Transport, freight, light commercial vehicle {GLO}   market group for transport, freight, light commercial vehicle   Cut-off, U | Transport, freight, sea, container ship {GLO}   market for transport, freight, sea, container ship   Cut-off, U | Electricity, medium voltage {CN}   market group for   Cut-off, U | Electricity, medium voltage {GB}   market for   Cut-off, U | Electricity, medium voltage {MX}   market for   Cut-off, U | PPE clinical waste |
|--------------------------------------|-----------------------|----------|---------------------------------------------------------------------------------------------------|--------------------------------------------------|----------------------------------------------------------|---------------------------------------------------------------------------|------------------------------------------------------------|---------------------------------------------------------------------------------------------------------------------|---------------------------------------------------------------------------------------------------------------------------------|-----------------------------------------------------------------------------------------------------------------|------------------------------------------------------------------|------------------------------------------------------------|------------------------------------------------------------|--------------------|
| <b>Global warming</b>                | kg CO <sub>2</sub> e  | 0.013491 | 0.004502                                                                                          | 0.000788                                         | 0.000151                                                 | 0.000281                                                                  | 0.001226                                                   | 0.000141                                                                                                            | 0.000194                                                                                                                        | 0.000492                                                                                                        | 0.000493                                                         | 3.20E-05                                                   | 2.51E-05                                                   | 0.005167           |
| <b>Stratospheric ozone depletion</b> | kg CFC11 eq           | 5.25E-09 | 1.29E-09                                                                                          | 5.02E-10                                         | 5.26E-11                                                 | 2.80E-10                                                                  | 6.10E-10                                                   | 6.58E-11                                                                                                            | 1.17E-10                                                                                                                        | 3.45E-10                                                                                                        | 1.05E-10                                                         | 1.64E-11                                                   | 3.32E-11                                                   | 1.84E-09           |
| <b>Ionizing radiation</b>            | kBq Co-60 eq          | 0.000545 | 0.000257                                                                                          | 6.21E-05                                         | 1.12E-05                                                 | 8.39E-06                                                                  | 8.61E-05                                                   | 2.75E-06                                                                                                            | 6.01E-06                                                                                                                        | 5.11E-06                                                                                                        | 7.56E-06                                                         | 1.84E-05                                                   | 1.51E-06                                                   | 7.85E-05           |
| <b>Ozone formation, Human health</b> | kg NO <sub>x</sub> eq | 3.52E-05 | 1.07E-05                                                                                          | 2.06E-06                                         | 3.42E-07                                                 | 8.80E-07                                                                  | 3.33E-06                                                   | 7.64E-07                                                                                                            | 8.70E-07                                                                                                                        | 1.02E-05                                                                                                        | 1.37E-06                                                         | 5.59E-08                                                   | 4.29E-08                                                   | 4.55E-06           |
| <b>Fine particulate</b>              | kg PM2.5 eq           | 1.86E-05 | 5.99E-06                                                                                          | 1.40E-06                                         | 2.88E-07                                                 | 4.62E-07                                                                  | 2.35E-06                                                   | 2.05E-07                                                                                                            | 3.09E-07                                                                                                                        | 3.27E-06                                                                                                        | 7.53E-07                                                         | 2.59E-08                                                   | 5.78E-08                                                   | 3.46E-06           |

|                                                |                          |          |          |          |          |          |          |          |          |          |          |          |          |          |
|------------------------------------------------|--------------------------|----------|----------|----------|----------|----------|----------|----------|----------|----------|----------|----------|----------|----------|
| <b>matter formation</b>                        |                          |          |          |          |          |          |          |          |          |          |          |          |          |          |
| <b>Ozone formation, Terrestrial ecosystems</b> | kg NO <sub>x</sub> eq    | 3.61E-05 | 1.12E-05 | 2.23E-06 | 3.59E-07 | 8.98E-07 | 3.37E-06 | 7.79E-07 | 8.97E-07 | 1.03E-05 | 1.37E-06 | 5.65E-08 | 4.36E-08 | 4.64E-06 |
| <b>Terrestrial acidification</b>               | kg SO <sub>2</sub> eq    | 4.50E-05 | 1.35E-05 | 3.05E-06 | 5.05E-07 | 9.94E-07 | 4.91E-06 | 4.73E-07 | 6.73E-07 | 1.01E-05 | 1.68E-06 | 7.54E-08 | 8.24E-08 | 8.95E-06 |
| <b>Freshwater eutrophication</b>               | kg P eq                  | 4.04E-06 | 1.21E-06 | 2.48E-07 | 5.89E-08 | 1.12E-07 | 4.29E-07 | 1.29E-08 | 3.59E-08 | 1.93E-08 | 9.00E-08 | 6.73E-09 | 1.13E-08 | 1.80E-06 |
| <b>Marine eutrophication</b>                   | kg N eq                  | 3.95E-07 | 1.10E-07 | 1.80E-08 | 4.97E-09 | 6.36E-08 | 8.24E-08 | 1.03E-09 | 2.16E-09 | 1.86E-09 | 5.82E-09 | 7.58E-10 | 7.39E-10 | 1.04E-07 |
| <b>Terrestrial ecotoxicity</b>                 | kg 1,4-DCB               | 0.029517 | 0.010496 | 0.002916 | 0.000173 | 0.001176 | 0.00318  | 0.002688 | 0.001276 | 0.00131  | 0.000326 | 3.48E-05 | 2.84E-05 | 0.00591  |
| <b>Freshwater ecotoxicity</b>                  | kg 1,4-DCB               | 0.00042  | 0.000176 | 4.88E-05 | 6.83E-06 | 1.25E-05 | 3.26E-05 | 3.30E-06 | 1.88E-05 | 5.26E-06 | 7.57E-06 | 8.48E-07 | 5.87E-07 | 0.000107 |
| <b>Marine ecotoxicity</b>                      | kg 1,4-DCB               | 0.000556 | 0.000228 | 6.46E-05 | 8.81E-06 | 1.63E-05 | 4.35E-05 | 5.75E-06 | 2.49E-05 | 7.52E-06 | 1.00E-05 | 1.15E-06 | 7.82E-07 | 0.000145 |
| <b>Human carcinogenic toxicity</b>             | kg 1,4-DCB               | 0.00082  | 0.00014  | 3.11E-05 | 1.12E-05 | 8.35E-06 | 3.73E-05 | 3.24E-06 | 8.67E-06 | 1.11E-05 | 1.38E-05 | 7.55E-07 | 6.94E-07 | 0.000554 |
| <b>Human non-carcinogenic toxicity</b>         | kg 1,4-DCB               | 0.009203 | 0.003098 | 0.001084 | 0.000129 | 0.000304 | 0.001023 | 0.000108 | 0.000381 | 8.76E-05 | 0.000233 | 1.91E-05 | 1.45E-05 | 0.002722 |
| <b>Land use</b>                                | m <sup>2</sup> a crop eq | 0.000707 | 5.33E-05 | 2.59E-05 | 1.92E-06 | 0.000126 | 0.000437 | 7.70E-06 | 5.24E-06 | 1.75E-06 | 5.91E-06 | 3.55E-06 | 4.71E-08 | 3.81E-05 |
| <b>Mineral resource scarcity</b>               | kg Cu eq                 | 4.75E-05 | 1.21E-05 | 2.37E-05 | 5.70E-07 | 8.23E-07 | 2.86E-06 | 5.26E-07 | 9.25E-07 | 1.24E-06 | 2.05E-07 | 4.04E-08 | 1.31E-08 | 4.49E-06 |
| <b>Fossil resource scarcity</b>                | kg oil eq                | 0.004577 | 0.002837 | 0.000486 | 3.86E-05 | 7.93E-05 | 0.000322 | 4.86E-05 | 6.31E-05 | 0.000145 | 9.57E-05 | 1.08E-05 | 7.69E-06 | 0.000444 |
| <b>Water consumption</b>                       | m <sup>3</sup>           | 9.55E-05 | 4.30E-05 | 1.27E-05 | 1.17E-06 | 3.36E-06 | 1.53E-05 | 2.59E-07 | 4.76E-07 | 3.28E-07 | 1.21E-06 | 1.40E-07 | 4.80E-08 | 1.75E-05 |

Environmental impacts (midpoint categories) measured using life cycle assessment modelled on one Type II surgical mask (with shipping, and waste via hazardous incineration). 1,4-DCB =dichlorobenzene, CFC11= Trichlorofluoromethane, CO<sub>2</sub>e= carbon dioxide equivalents, Cu= copper, eq= equivalents, kBq Co-60 eq = kilobecquerel Cobalt-60, m<sup>2</sup>a = square meter years, N= nitrogen, NO<sub>x</sub>= nitrous oxides, P=phosphate, PM2.5 = particulate matter <2.5 micrometers, SO<sub>2</sub>= sulphur dioxide

**Supplementary Table 11: Environmental impact of one surgical mask (Type IIR)**

| Impact category                         | Unit                     | Total    | Textile, non-woven polypropylene {GLO}   market for textile, non woven polypropylene   Cut-off, U | Sheet rolling, aluminium {GLO}   market for   Cut-off, U | Synthetic rubber {GLO}   market for   Cut-off, U | Corrugated board box {RoW}   market for corrugated board box   Cut-off, U | Folding boxboard/chipboard {GLO}   market for   Cut-off, U | T Transport, freight, sea, container ship {GLO}   market for transport, freight, sea, container ship   Cut-off, U | Transport, freight, light commercial vehicle {GLO}   market group for transport, freight, light commercial vehicle   Cut-off, U | Transport, freight, lorry, unspecified {GLO}   market group for transport, freight, lorry, unspecified   Cut-off, U | Electricity, medium voltage {CN}   market group for   Cut-off, U | Electricity, medium voltage {MX}   market for   Cut-off, U | Electricity, medium voltage {GB}   market for   Cut-off, U | ppe clinical waste |
|-----------------------------------------|--------------------------|----------|---------------------------------------------------------------------------------------------------|----------------------------------------------------------|--------------------------------------------------|---------------------------------------------------------------------------|------------------------------------------------------------|-------------------------------------------------------------------------------------------------------------------|---------------------------------------------------------------------------------------------------------------------------------|---------------------------------------------------------------------------------------------------------------------|------------------------------------------------------------------|------------------------------------------------------------|------------------------------------------------------------|--------------------|
| Global warming                          | kg CO <sub>2</sub> e     | 0.020192 | 0.007354                                                                                          | 0.000131                                                 | 0.001267                                         | 0.000302                                                                  | 0.00124                                                    | 0.000656                                                                                                          | 0.000259                                                                                                                        | 0.000188                                                                                                            | 0.00076                                                          | 3.87E-05                                                   | 7.40E-05                                                   | 0.007968           |
| Stratospheric ozone depletion           | kg CFC11 eq              | 7.63E-09 | 2.10E-09                                                                                          | 4.57E-11                                                 | 8.07E-10                                         | 3.00E-10                                                                  | 6.17E-10                                                   | 4.60E-10                                                                                                          | 1.56E-10                                                                                                                        | 8.78E-11                                                                                                            | 1.62E-10                                                         | 5.13E-11                                                   | 3.80E-11                                                   | 2.83E-09           |
| Ionizing radiation                      | kBq Co-60 eq             | 0.000807 | 0.00042                                                                                           | 9.76E-06                                                 | 9.98E-05                                         | 8.99E-06                                                                  | 8.71E-05                                                   | 6.81E-06                                                                                                          | 8.02E-06                                                                                                                        | 3.66E-06                                                                                                            | 1.17E-05                                                         | 2.33E-06                                                   | 4.26E-05                                                   | 1.21E-04           |
| Ozone formation, Human health           | kg NO <sub>x</sub> eq    | 5.04E-05 | 1.74E-05                                                                                          | 2.98E-07                                                 | 3.31E-06                                         | 9.42E-07                                                                  | 3.37E-06                                                   | 1.36E-05                                                                                                          | 1.16E-06                                                                                                                        | 1.02E-06                                                                                                            | 2.11E-06                                                         | 6.61E-08                                                   | 1.29E-07                                                   | 7.02E-06           |
| Fine particulate matter formation       | kg PM2.5 eq              | 2.68E-05 | 9.78E-06                                                                                          | 2.50E-07                                                 | 2.26E-06                                         | 4.95E-07                                                                  | 2.37E-06                                                   | 4.35E-06                                                                                                          | 4.13E-07                                                                                                                        | 2.73E-07                                                                                                            | 1.16E-06                                                         | 8.92E-08                                                   | 6.00E-08                                                   | 5.33E-06           |
| Ozone formation, Terrestrial ecosystems | kg NO <sub>x</sub> eq    | 5.19E-05 | 1.83E-05                                                                                          | 3.12E-07                                                 | 3.59E-06                                         | 9.62E-07                                                                  | 3.41E-06                                                   | 1.37E-05                                                                                                          | 1.20E-06                                                                                                                        | 1.04E-06                                                                                                            | 2.11E-06                                                         | 6.73E-08                                                   | 1.31E-07                                                   | 7.15E-06           |
| Terrestrial acidification               | kg SO <sub>2</sub> eq    | 6.50E-05 | 2.20E-05                                                                                          | 4.39E-07                                                 | 4.90E-06                                         | 1.06E-06                                                                  | 4.97E-06                                                   | 1.35E-05                                                                                                          | 8.97E-07                                                                                                                        | 6.30E-07                                                                                                            | 2.59E-06                                                         | 1.27E-07                                                   | 1.74E-07                                                   | 1.38E-05           |
| Freshwater eutrophication               | kg P eq                  | 6.01E-06 | 1.98E-06                                                                                          | 5.12E-08                                                 | 3.99E-07                                         | 1.20E-07                                                                  | 4.34E-07                                                   | 2.58E-08                                                                                                          | 4.79E-08                                                                                                                        | 1.72E-08                                                                                                            | 1.39E-07                                                         | 1.75E-08                                                   | 1.56E-08                                                   | 2.78E-06           |
| Marine eutrophication                   | kg N eq                  | 5.38E-07 | 1.79E-07                                                                                          | 4.32E-09                                                 | 2.89E-08                                         | 6.82E-08                                                                  | 8.34E-08                                                   | 2.48E-09                                                                                                          | 2.89E-09                                                                                                                        | 1.38E-09                                                                                                            | 8.98E-09                                                         | 1.14E-09                                                   | 1.75E-09                                                   | 1.61E-07           |
| Terrestrial ecotoxicity                 | kg 1,4-DCB               | 0.043126 | 0.017144                                                                                          | 0.000151                                                 | 0.004687                                         | 0.00126                                                                   | 0.003218                                                   | 0.001748                                                                                                          | 0.001702                                                                                                                        | 0.003585                                                                                                            | 0.000502                                                         | 4.38E-05                                                   | 8.06E-05                                                   | 0.009116           |
| Freshwater ecotoxicity                  | kg 1,4-DCB               | 0.000633 | 0.000287                                                                                          | 5.94E-06                                                 | 7.85E-05                                         | 1.34E-05                                                                  | 3.30E-05                                                   | 7.02E-06                                                                                                          | 2.51E-05                                                                                                                        | 4.40E-06                                                                                                            | 1.17E-05                                                         | 9.05E-07                                                   | 1.96E-06                                                   | 0.000166           |
| Marine ecotoxicity                      | kg 1,4-DCB               | 0.000837 | 0.000372                                                                                          | 7.66E-06                                                 | 0.000104                                         | 1.75E-05                                                                  | 4.40E-05                                                   | 1.00E-05                                                                                                          | 3.32E-05                                                                                                                        | 7.66E-06                                                                                                            | 1.54E-05                                                         | 1.21E-06                                                   | 2.67E-06                                                   | 0.000224           |
| Human carcinogenic toxicity             | kg 1,4-DCB               | 0.001243 | 0.000228                                                                                          | 9.70E-06                                                 | 5.01E-05                                         | 8.94E-06                                                                  | 3.78E-05                                                   | 1.48E-05                                                                                                          | 1.16E-05                                                                                                                        | 4.32E-06                                                                                                            | 2.14E-05                                                         | 1.07E-06                                                   | 1.75E-06                                                   | 0.000855           |
| Human non-carcinogenic toxicity         | kg 1,4-DCB               | 0.013631 | 0.00506                                                                                           | 0.000113                                                 | 0.001742                                         | 0.000326                                                                  | 0.001035                                                   | 0.000117                                                                                                          | 0.000508                                                                                                                        | 0.000144                                                                                                            | 0.00036                                                          | 2.24E-05                                                   | 4.41E-05                                                   | 0.004198           |
| Land use                                | m <sup>2</sup> a crop eq | 0.000792 | 8.71E-05                                                                                          | 1.67E-06                                                 | 4.16E-05                                         | 0.000135                                                                  | 0.000442                                                   | 2.33E-06                                                                                                          | 6.99E-06                                                                                                                        | 1.03E-05                                                                                                            | 9.11E-06                                                         | 7.26E-08                                                   | 8.20E-06                                                   | 5.87E-05           |
| Mineral resource scarcity               | kg Cu eq                 | 7.30E-05 | 1.97E-05                                                                                          | 4.96E-07                                                 | 3.81E-05                                         | 8.82E-07                                                                  | 2.89E-06                                                   | 1.65E-06                                                                                                          | 1.23E-06                                                                                                                        | 7.02E-07                                                                                                            | 3.17E-07                                                         | 2.02E-08                                                   | 9.34E-08                                                   | 6.92E-06           |



|                                 |                |          |          |          |          |          |          |          |          |          |          |          |          |          |
|---------------------------------|----------------|----------|----------|----------|----------|----------|----------|----------|----------|----------|----------|----------|----------|----------|
| <b>Fossil resource scarcity</b> | kg oil eq      | 0.007056 | 0.004634 | 3.36E-05 | 0.000781 | 8.50E-05 | 0.000326 | 0.000193 | 8.41E-05 | 6.48E-05 | 0.000148 | 1.19E-05 | 2.51E-05 | 0.000684 |
| <b>Water consumption</b>        | m <sup>3</sup> | 0.000141 | 7.02E-05 | 1.02E-06 | 2.05E-05 | 3.60E-06 | 1.55E-05 | 4.37E-07 | 6.35E-07 | 3.46E-07 | 1.87E-06 | 7.40E-08 | 3.24E-07 | 2.70E-05 |

Environmental impacts (midpoint categories) measured using life cycle assessment modelled on one Type IIR surgical mask (with shipping, and waste via hazardous incineration). 1,4-DCB =dichlorobenzene, CFC11= Trichlorofluoromethane, CO<sub>2</sub>e= carbon dioxide equivalents, Cu= copper, eq= equivalents, kBq Co-60 eq = kilobecquerel Cobalt-60, m<sup>2</sup>a = square meter years, N= nitrogen, NO<sub>x</sub>= nitrous oxides, P=phosphate, PM2.5 = particulate matter <2.5 micrometers, SO<sub>2</sub>= sulphur dioxide

**Supplementary Table 12: Environmental impact of scenario models (midpoint categories)**

| Impact category                         | Unit                     | Shipping (Base scenario) | Air freight | UK manufacture | Reduce   | Reuse     | Recycle   | Combination |
|-----------------------------------------|--------------------------|--------------------------|-------------|----------------|----------|-----------|-----------|-------------|
| Global warming                          | kg CO <sub>2</sub> e     | 1.06E+08                 | 1.59E+08    | 9.40E+07       | 5.82E+07 | 9.54E+07  | 6.92E+07  | 2.66E+07    |
| Stratospheric ozone depletion           | kg CFC11 eq              | 40.538965                | 52.84834    | 37.8953        | 19.1113  | 37.169319 | 27.297802 | 8.5314768   |
| Ionizing radiation                      | kBq Co-60 eq             | 3882726.8                | 4393781     | 8070889        | 2247673  | 3586704.4 | 3316442   | 2191322.8   |
| Ozone formation, Human health           | kg NO <sub>x</sub> eq    | 244352.67                | 467441      | 172731         | 140816.6 | 216256.7  | 211507.29 | 64913.055   |
| Fine particulate matter formation       | kg PM <sub>2.5</sub> eq  | 157695.7                 | 195349.3    | 106342.3       | 74078.88 | 143214.97 | 132765.47 | 36093.199   |
| Ozone formation, Terrestrial ecosystems | kg NO <sub>x</sub> eq    | 254583.89                | 479487.2    | 182411.1       | 146581.1 | 225403.83 | 221150.88 | 69118.6     |
| Terrestrial acidification               | kg SO <sub>2</sub> eq    | 341021.9                 | 452932.5    | 247915.7       | 179785.7 | 305172.63 | 276487.71 | 80324.334   |
| Freshwater eutrophication               | kg P eq                  | 33786.378                | 34486.74    | 28534.56       | 16823.66 | 30591.98  | 20784.428 | 7122.7384   |
| Marine eutrophication                   | kg N eq                  | 3017.4222                | 3071.634    | 2739.373       | 1838.291 | 2720.1492 | 2265.1849 | 1169.83     |
| Terrestrial ecotoxicity                 | kg 1,4-DCB               | 2.11E+08                 | 2.97E+08    | 2.01E+08       | 1.10E+08 | 1.90E+08  | 1.68E+08  | 65225857    |
| Freshwater ecotoxicity                  | kg 1,4-DCB               | 3361093.7                | 3507965     | 3174324        | 1630832  | 3036956.3 | 2587047.1 | 912910.91   |
| Marine ecotoxicity                      | kg 1,4-DCB               | 4475710.3                | 4726242     | 4228065        | 2167458  | 4045755.3 | 3427117.7 | 1204522.6   |
| Human carcinogenic toxicity             | kg 1,4-DCB               | 6345112.4                | 6470094     | 5867629        | 3484960  | 5646296.9 | 2347669.2 | 829587.02   |
| Human non-carcinogenic toxicity         | kg 1,4-DCB               | 78904366                 | 89983829    | 71674682       | 36576646 | 7.20E+07  | 59273197  | 19548776    |
| Land use                                | m <sup>2</sup> a crop eq | 2634024.8                | 2728783     | 3295467        | 1563170  | 2640316.1 | 2359449.1 | 1518460.9   |
| Mineral resource scarcity               | kg Cu eq                 | 667193.13                | 679485.6    | 662431.3       | 138218   | 638533.59 | 634807.18 | 91173.241   |
| Fossil resource scarcity                | kg oil eq                | 36593143                 | 53682001    | 34013493       | 20633254 | 32450424  | 33392554  | 14406081    |
| Water consumption                       | m <sup>3</sup>           | 973330.73                | 992483.5    | 900477.8       | 546163.7 | 863685.01 | 847130.81 | 373862      |

Environmental impact (midpoint categories) of PPE distributed to health and social care services in England by NHS Supply Chain between 25<sup>th</sup> February and 23<sup>rd</sup> August 2020,, measured using life cycle assessment, modelling base scenario (shipping, single-use PPE, clinical waste), air freight, UK manufacture, reduce (zero glove use), reuse (reusable gown, reuse of face shield, all other items single-use), recycling, and combination of measures. 1,4-DCB =dichlorobenzene, CFC11= Trichlorofluoromethane, CO<sub>2</sub>e= carbon dioxide equivalents, Cu= copper, eq= equivalents, kBq Co-

60 eq = kilobecquerel Cobalt-60, m<sup>2</sup>a = square meter years, N= nitrogen, NO<sub>x</sub>= nitrous oxides, P=phosphate, PM2.5 = particulate matter <2.5 micrometers, SO<sub>2</sub>= sulphur dioxide

**Supplementary Table 13: Environmental impact of scenario models (endpoint categories)**

| Damage category | Unit       | Shipping (Base Scenario) | Air freight | UK manufacture | Reduce    | Reuse      | Recycle    | Combination |
|-----------------|------------|--------------------------|-------------|----------------|-----------|------------|------------|-------------|
| Human health    | DALY       | 239                      | 314         | 192            | 122       | 215        | 171        | 55          |
| Ecosystems      | species.yr | 0.466                    | 0.668       | 0.403          | 0.255     | 0.419      | 0.330      | 0.125       |
| Resources       | US \$      | 12,697,261               | 20,366,321  | 12,253,727     | 7,277,962 | 11,188,442 | 12,018,323 | 5,320,902   |

Environmental impact (endpoint categories) of PPE distributed to health and social care services in England by NHS Supply Chain between 25<sup>th</sup> February and 23<sup>rd</sup> August 2020, measured using life cycle assessment, modelling base scenario (shipping, single-use PPE, clinical waste), air freight, UK manufacture, reduce (zero glove use), reuse (reusable gown, reuse of face shield, all other items single-use), recycling, and combination of measures (UK manufacture, reduce, reuse and recycle). DALYs= disability adjusted life years, species.year=loss of local species per year, US\$=extra costs involved for future mineral and fossil resource extraction
